# Supplementary material
Source: Springer Nature journal article supplement (https://www.springermedizin.de/resource/supplementary/12889_2008_1437_MOESM7_ESM.pdf/9503866)

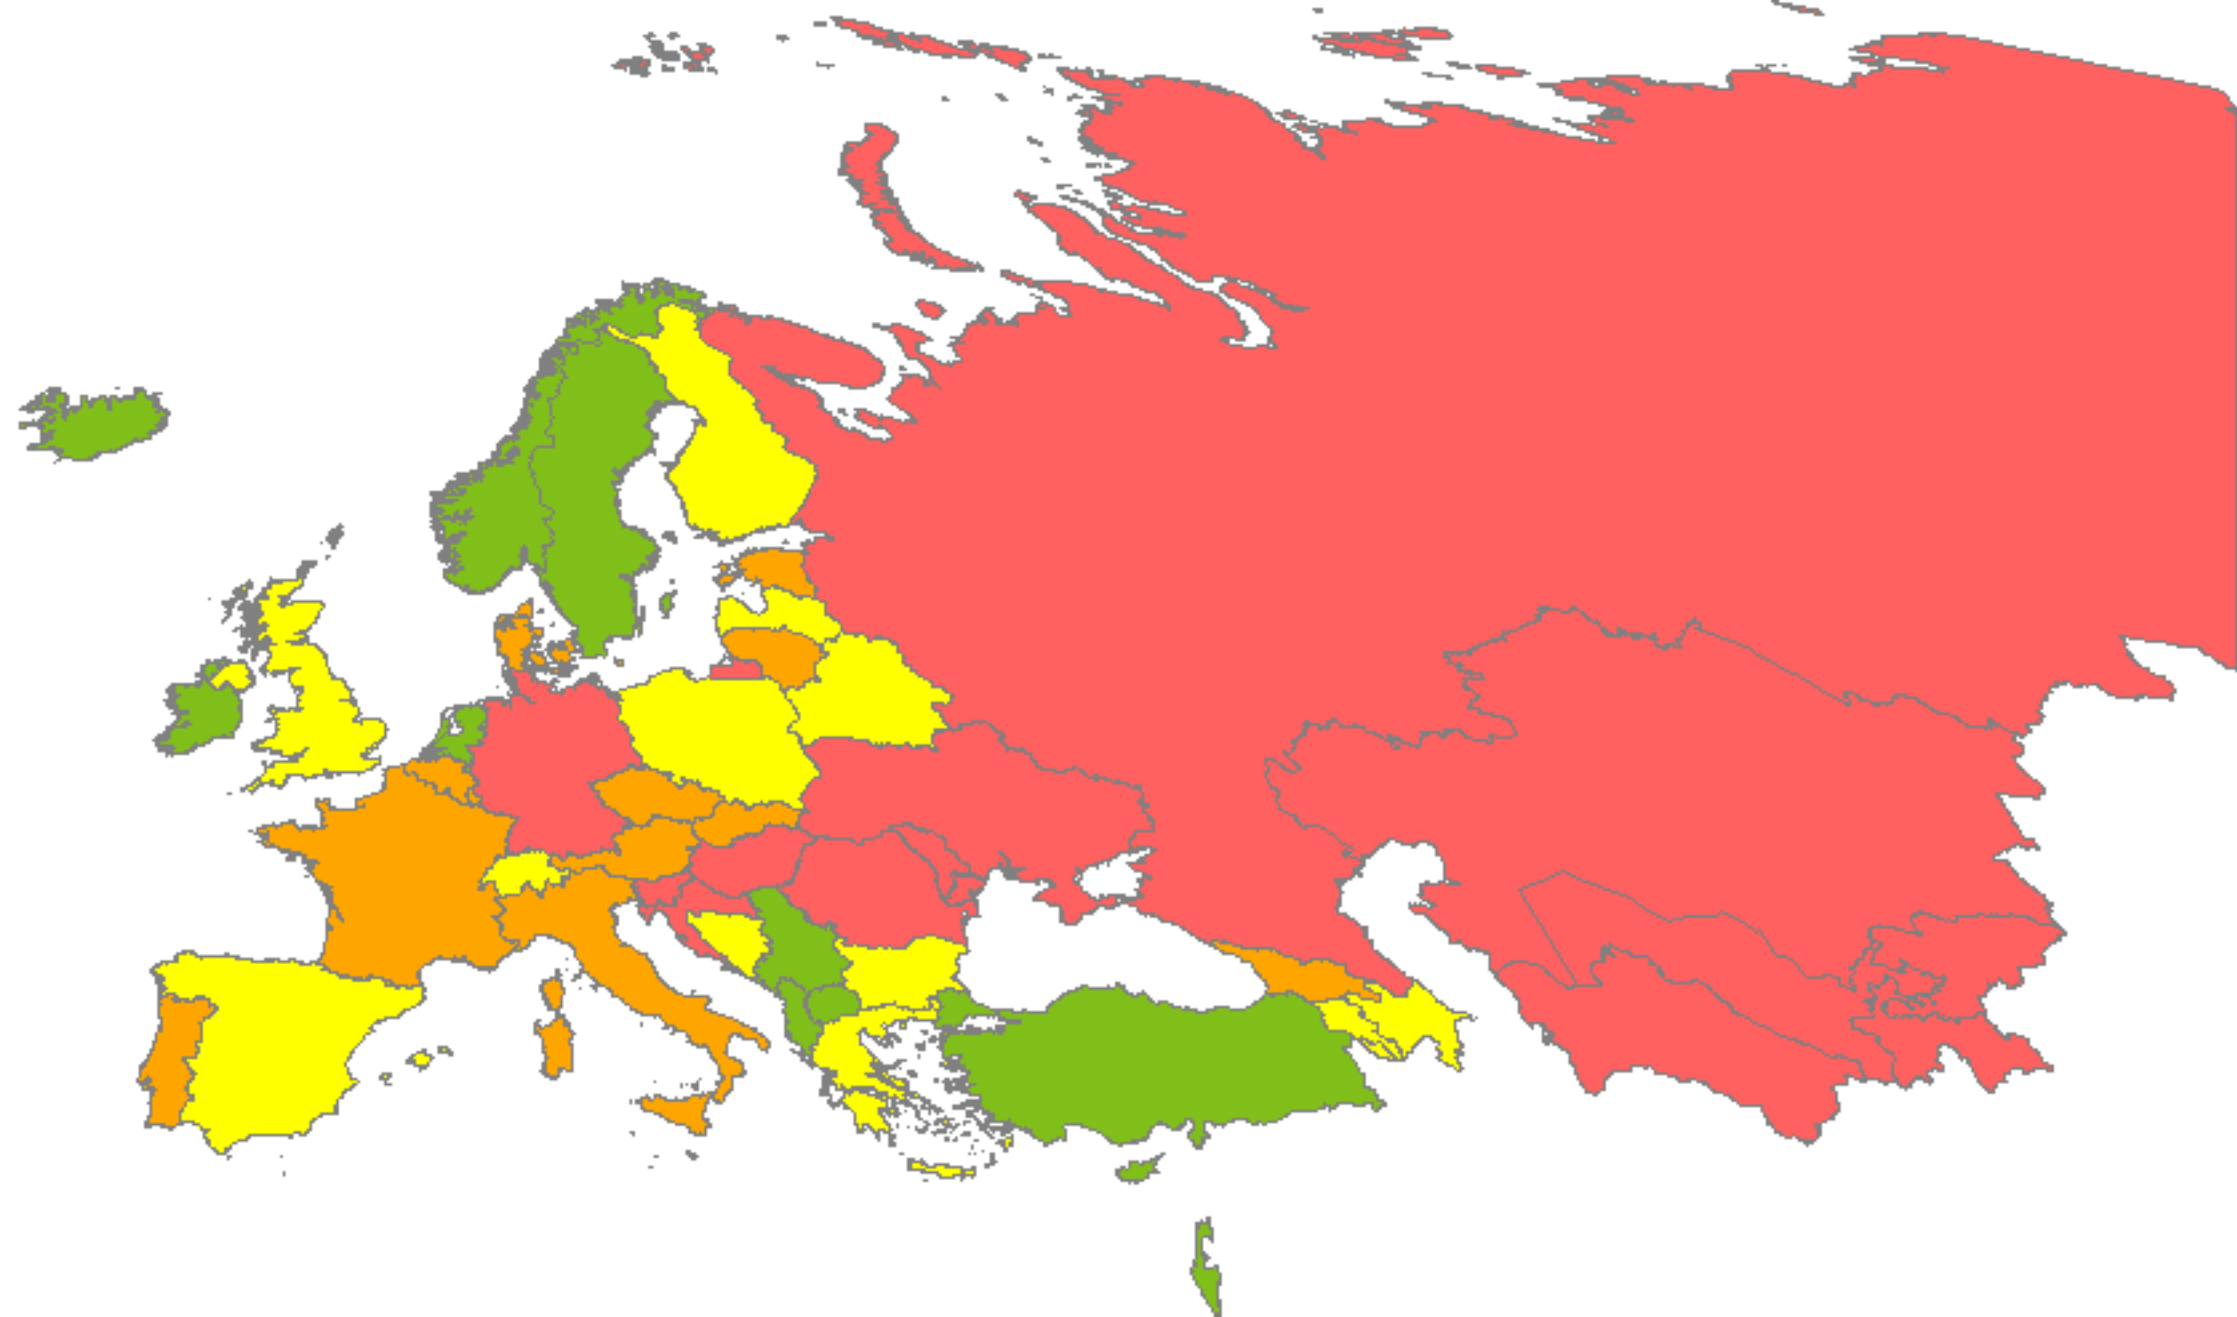

DALY Rate

(DALYs per 100 000):

■  $\leq 68$

■ 68 – 115

■ 115 – 155

■  $> 155$

Supplement: MOESM7 [file 9503866]
